# Supplementary material for: Increased Water-Solubility and Maintained Antioxidant Power of Resveratrol by Its Encapsulation in Vitamin E TPGS Micelles: A Potential Nutritional Supplement for Chronic Liver Disease
Source: MDPI journal article supplement (doi:10.3390/pharmaceutics13081128), 2021-07-23
Supplement: s1 [file s1]

# Supplementary Materials: Increased Water-Solubility and Maintained Antioxidant Power of Resveratrol by Its Encapsulation in Vitamin E TPGS Micelles: A Potential Nutritional Supplement for Chronic Liver Disease

Guendalina Zuccari, Silvana Alfei, Alessia Zorzoli, Danilo Marimpietri, Federica Turrini, Sara Baldassari, Leonardo Marchitto and Gabriele Caviglioli

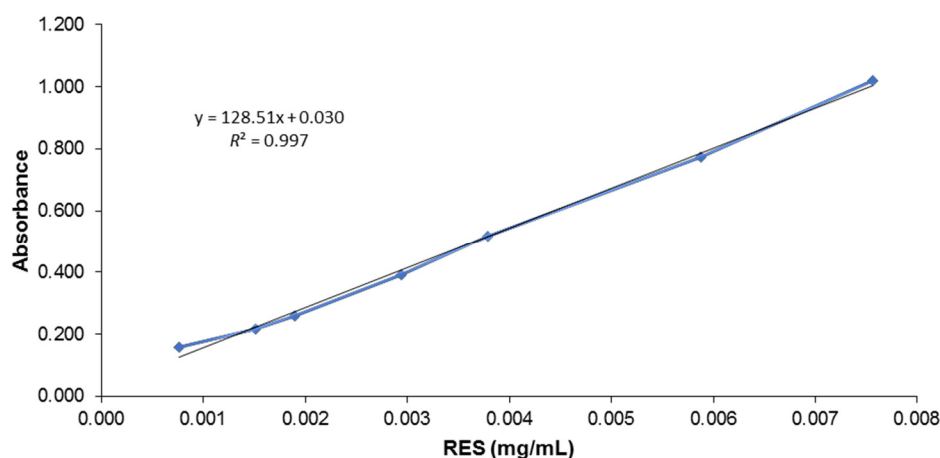

**Figure S1.** RES calibration curve in methanol at  $\lambda_{\max} = 306$  nm using an UV-Vis spectrophotometer within a range 3.33–331.70  $\mu$ M.

## Results

|                                | Size (d.nm...        | % Intensity  | Width (d.n... |
|--------------------------------|----------------------|--------------|---------------|
| <b>Z-Average (d.nm): 11.88</b> | <b>Peak 1: 12.94</b> | <b>100.0</b> | <b>3.892</b>  |
| <b>Pdl: 0.148</b>              | <b>Peak 2: 0.000</b> | <b>0.0</b>   | <b>0.000</b>  |
| <b>Intercept: 0.940</b>        | <b>Peak 3: 0.000</b> | <b>0.0</b>   | <b>0.000</b>  |

Result quality **Good**

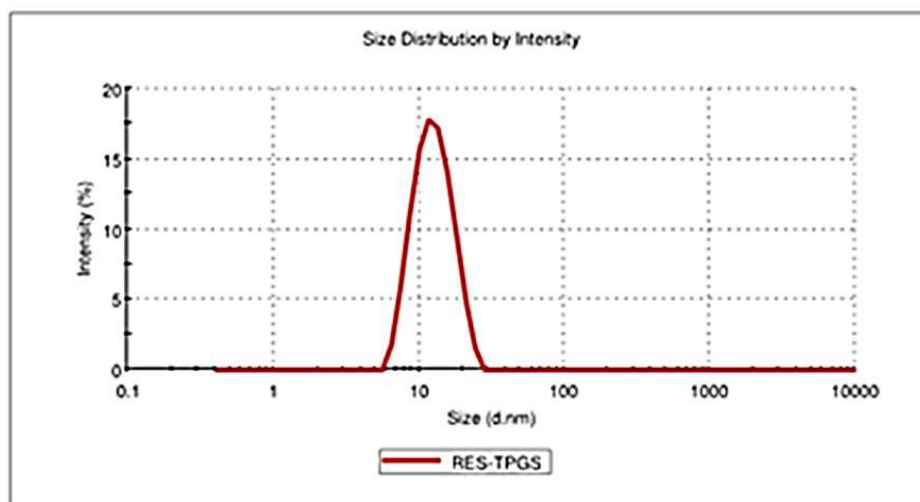

**Figure S2.** Representative size distribution of freshly prepared RES-TPGS colloidal dispersion.

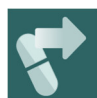

## Results

|                                | Size (d.nm...        | % Intensity  | Width (d.n... |
|--------------------------------|----------------------|--------------|---------------|
| <b>Z-Average (d.nm): 11,03</b> | <b>Peak 1: 12,13</b> | <b>100,0</b> | <b>3,273</b>  |
| <b>Pdl: 0,110</b>              | <b>Peak 2: 0,000</b> | <b>0,0</b>   | <b>0,000</b>  |
| <b>Intercept: 0,940</b>        | <b>Peak 3: 0,000</b> | <b>0,0</b>   | <b>0,000</b>  |
| <b>Result quality Good</b>     |                      |              |               |

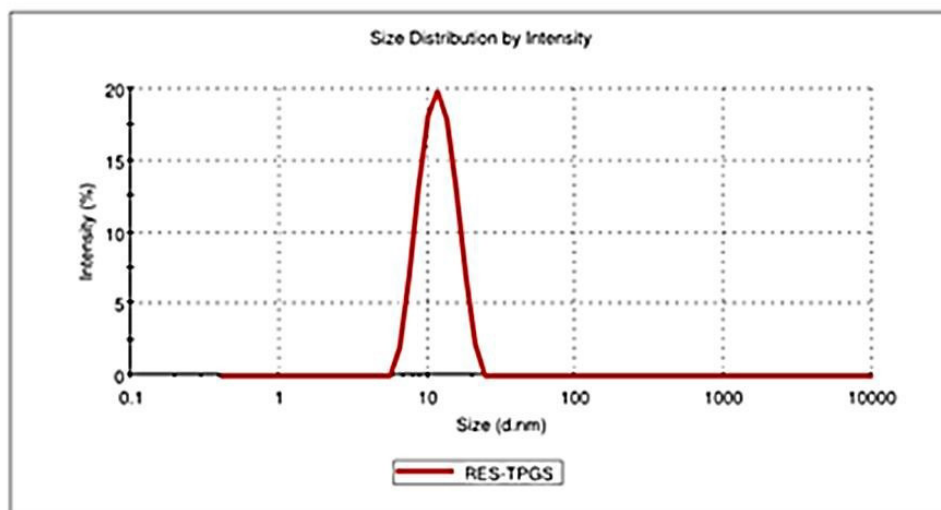

Figure S3. Representative size distribution of a RES-TPGS formulation reconstituted in water to its original volume from lyophilized powder.

## Results

|                                      | Mean (mV)            | Area (%)     | Width (mV)  |
|--------------------------------------|----------------------|--------------|-------------|
| <b>Zeta Potential (mV): -4,75</b>    | <b>Peak 1: -4,75</b> | <b>100,0</b> | <b>3,04</b> |
| <b>Zeta Deviation (mV): 3,04</b>     | <b>Peak 2: 0,00</b>  | <b>0,0</b>   | <b>0,00</b> |
| <b>Conductivity (mS/cm): 0,00600</b> | <b>Peak 3: 0,00</b>  | <b>0,0</b>   | <b>0,00</b> |
| <b>Result quality Good</b>           |                      |              |             |

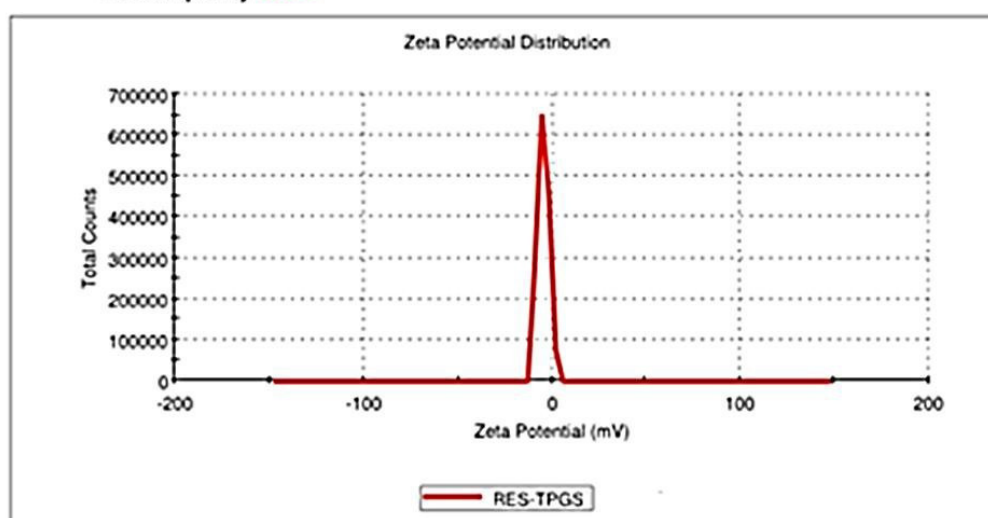

Figure S4. Representative distribution of the Z potentials of a RES-TPGS formulation measured in water.

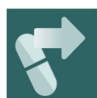

### Zero Order Kinetic Model

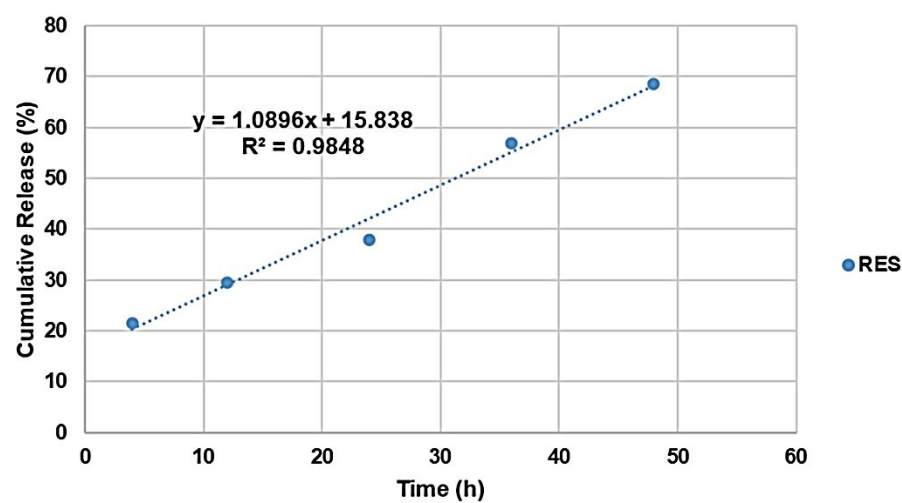

Figure S5. Zero order kinetic mathematical model.

### First Order Kinetic Model

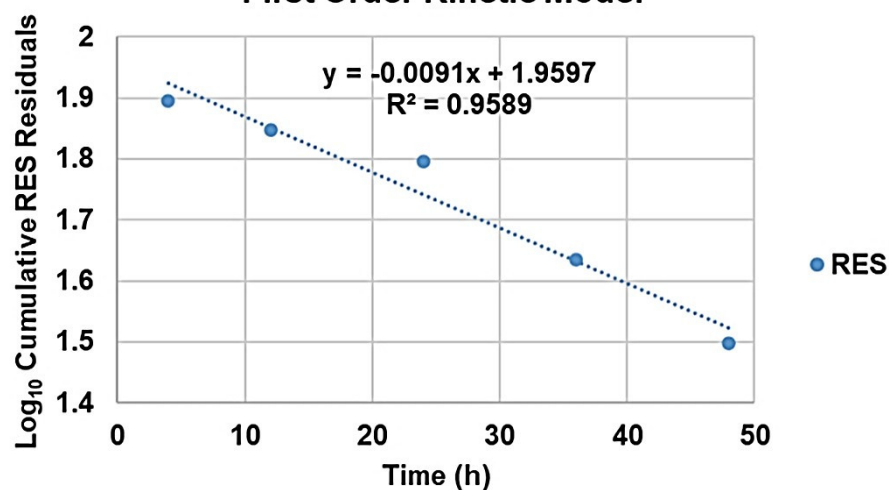

Figure S6. First order kinetic mathematical model.

### Higuchi Kinetic Model

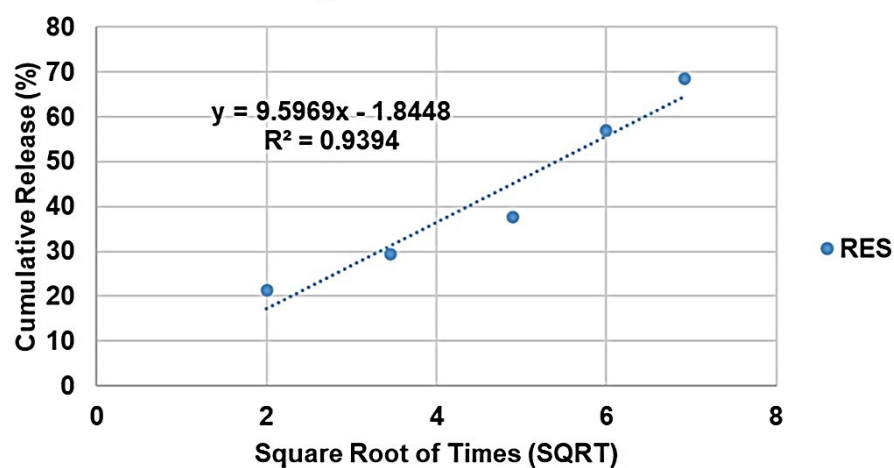

Figure S7. Higuchi kinetic mathematical model.

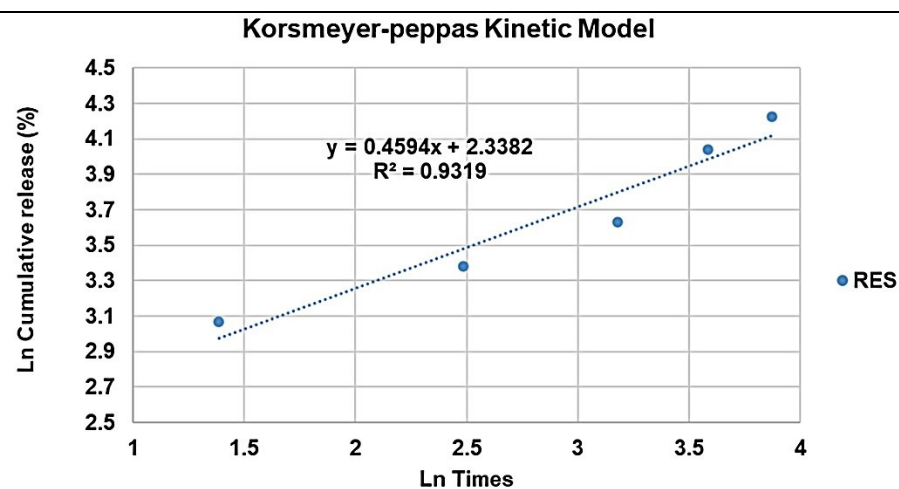

Figure S8. Korsmayer-Peppas kinetic mathematical model.

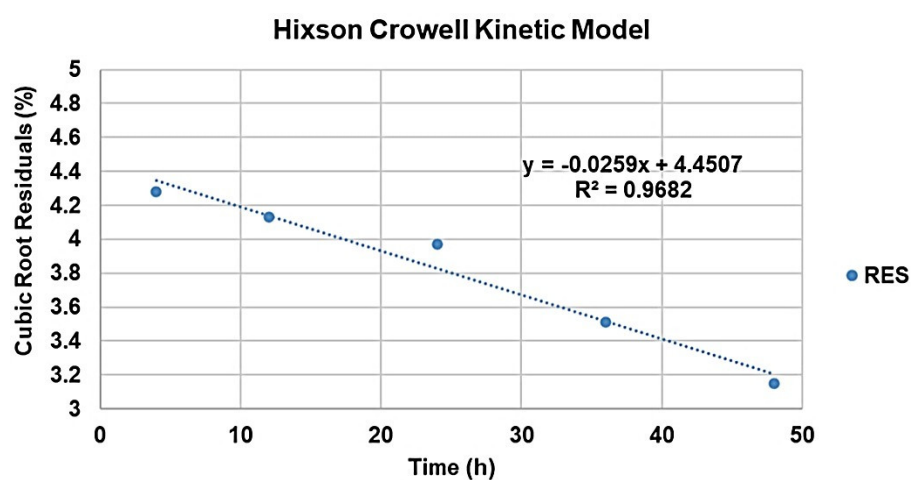

Figure S9. Hixson Crowel kinetic mathematical model.

**Table S1.** Particle size ratio ( $SI/S_f$ ) of the loaded formulations after reconstitution compared with those after fresh preparation.

| TPGS Concentration<br>(mg/mL) | $SI/S_f$ ratio <sup>1</sup> |
|-------------------------------|-----------------------------|
| 2                             | 1.0± 0.4                    |
| 4                             | 1.0± 0.2                    |
| 6                             | 1.2±0.1                     |
| 8                             | 1.3±0.4                     |
| 10                            | 1.1±0.2                     |
| 12                            | 1.1±0.1                     |
| 14                            | 1.2±0.3                     |

<sup>1</sup> Mean ± S.D. ( $n=3$ ).
